# Supplementary material
Source: publisher site journal article supplement (http://www.kjim.org/upload/media/kjim-2018-022-suppl3.pdf)
Supplement: Supplementary file 1 [file kjim-2018-022-suppl3.pdf]

**Supplementary Table 3. Results of multivariable analyses of the impact of the AST/ALT ratio on the risk of colorectal cancer in the Korean population**

| AST/ALT | Number     | Event, n | Duration, person-years | IR <sup>a</sup> | HR (95% CI)          |                      |                      |
|---------|------------|----------|------------------------|-----------------|----------------------|----------------------|----------------------|
|         |            |          |                        |                 | Model 1 <sup>b</sup> | Model 2 <sup>c</sup> | Model 3 <sup>d</sup> |
| < 1     | 7,247,646  | 43,567   | 38,854,776             | 1.12            | 1 (reference)        | 1 (reference)        | 1 (reference)        |
| 1 ≤     | 14,344,728 | 97,701   | 76,143,966             | 1.28            | 1.02 (1.01–1.03)     | 1.04 (1.02–1.05)     | 1.05 (1.04–1.06)     |

AST, aspartate aminotransferase; ALT, alanine aminotransferase; IR, incidence rate; HR, hazard ratios; CI, confidential interval. <sup>a</sup>1,000 person-year.

<sup>b</sup>Data are adjusted for age, sex.

<sup>c</sup>Data are adjusted for age, sex, smoking status, alcohol consumption, regular physical exercise and income.

<sup>d</sup>Data are adjusted for age, sex, smoking status, alcohol consumption, regular physical exercise, income, diabetes mellitus, hypertension, and dyslipidemia.
